# Supplementary material for: A multifunctional Ni-doped iron pyrite/reduced graphene oxide composite as an efficient counter electrode for DSSCs and as a non-enzymatic hydrogen peroxide electrochemical sensor
Source: Royal Society of Chemistry journal article supplement (doi:10.1039/d0dt01231a), 2020-01-01
Supplement: d0dt01231a1.pdf [file d0dt01231a1.pdf]

## Supporting Information

Multifunctional Ni-doped iron pyrite/reduced graphene oxide composite as an efficient counter electrode for DSSCs and a non-enzymatic hydrogen peroxide electrochemical sensor

Sanath Kumar <sup>a</sup>, Chih Hung Tsai <sup>b</sup>, Yen-Pei Fu <sup>a\*</sup>.

<sup>a</sup>Department of Materials Science and Engineering, National Dong Hwa University,  
Shoufeng, Hualien 97401, Taiwan

<sup>b</sup>Department of Opto-Electronic Engineering, National Dong Hwa University,  
Shoufeng, Hualien 97401, Taiwan

\*Corresponding author: Yen-Pei Fu

E-mail address: [ypfu@gms.ndhu.edu.tw](mailto:ypfu@gms.ndhu.edu.tw)

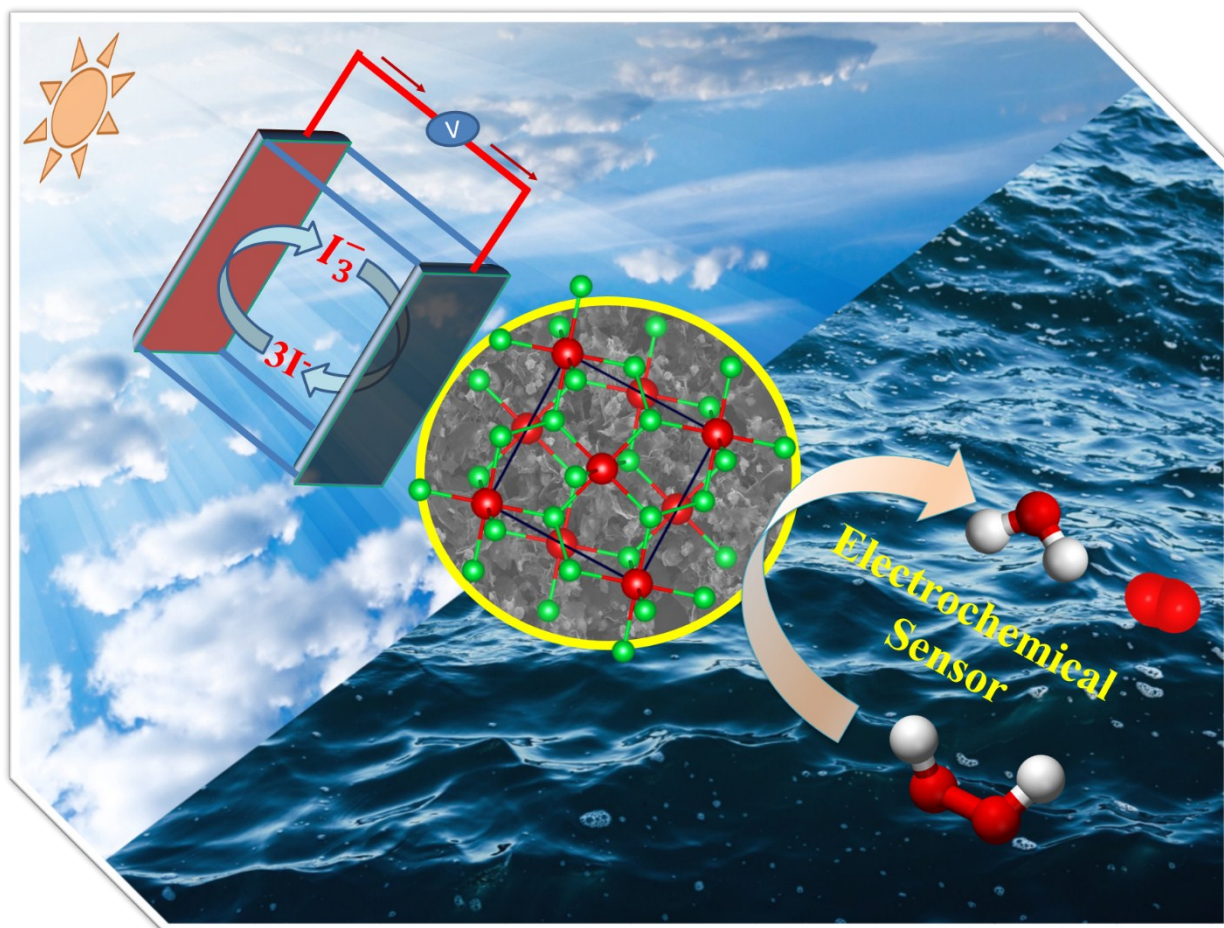

## XRD pattern of Graphene Oxide

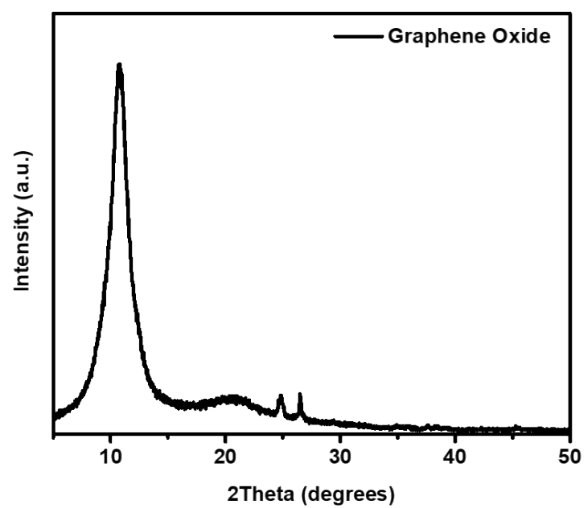

Fig. S1. XRD patterns of synthesized graphene oxide.

## Raman and Fourier transform infrared spectrum of NFG-2 composite

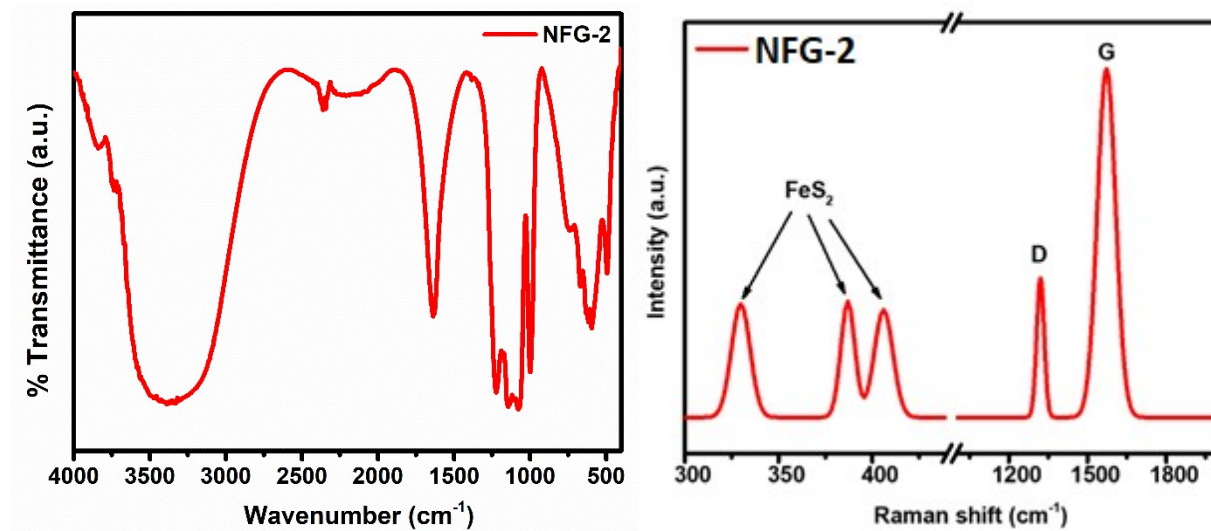

Fig. S2. (a) Fourier transform infrared spectrum and (b) Raman spectrum of NFG-2 composite.

## FESEM images of NFG-2 composite

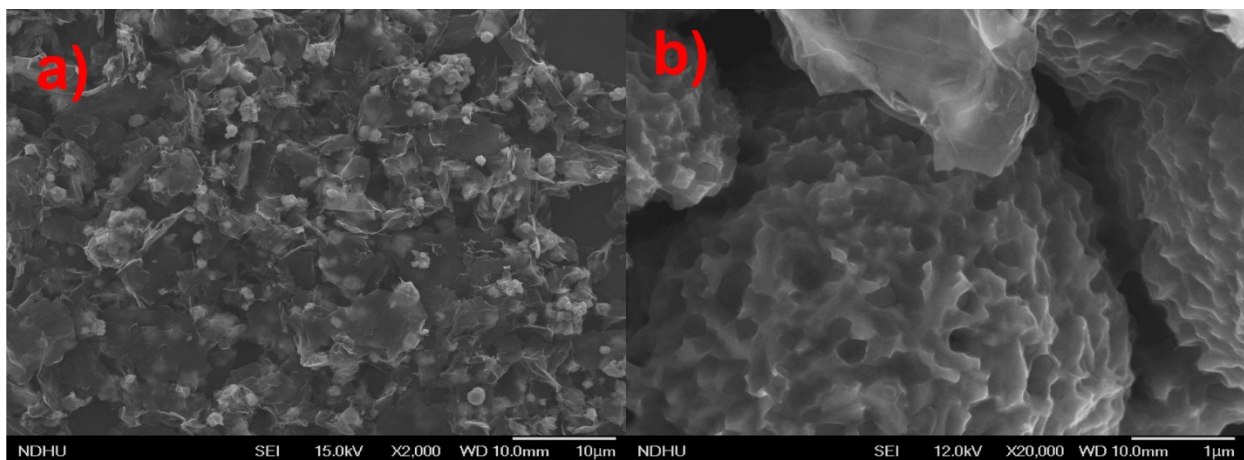

Fig. S3. Morphology of NFG-2 composite with various magnifications: (a) X2,000; (b) X20,000.

## FESEM-EDS mapping of NFG-2 composite

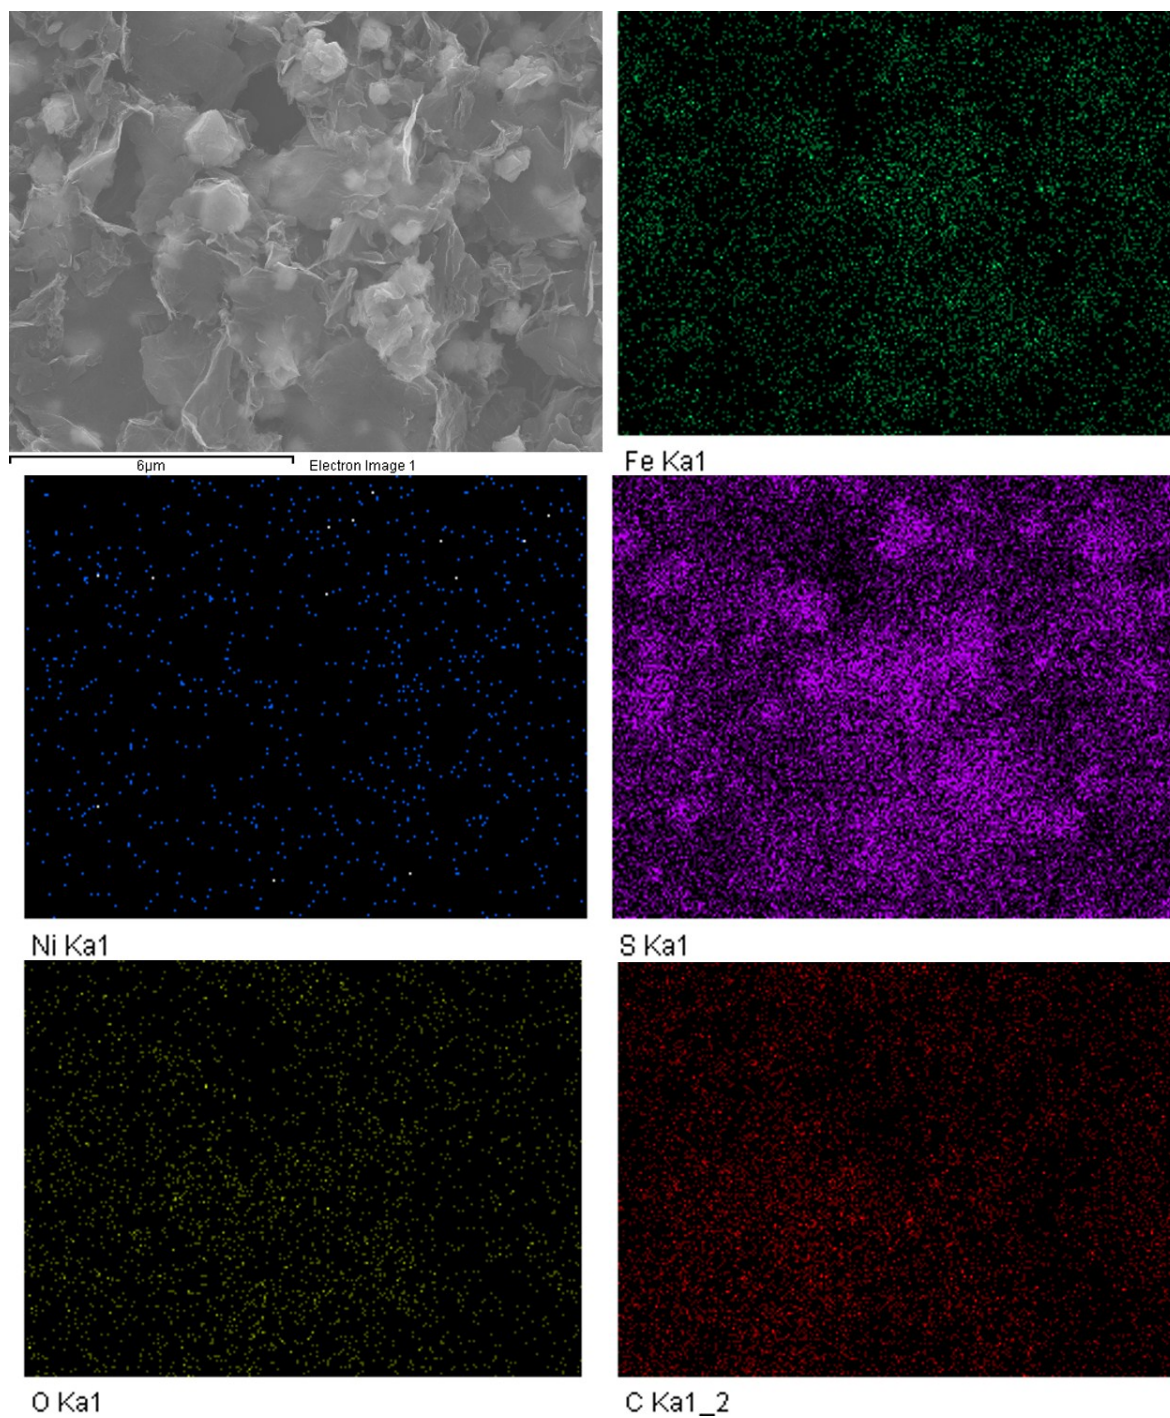

Fig. S4. FESEM-EDS mapping of NFG-2 composite.

Table S1: Elemental composition of NFG-2 composite obtained by EDS spectrum

| Element | Weight% | Atomic% |
|---------|---------|---------|
| C K     | 47.78   | 71.95   |
| O K     | 6.61    | 7.47    |
| S K     | 24.29   | 13.70   |
| Fe K    | 19.61   | 6.35    |
| Ni K    | 1.72    | 0.53    |
| Totals  | 100.00  | 100.00  |

**Linear relation of current density shifts vs the scan rate for NFG-2 composite**

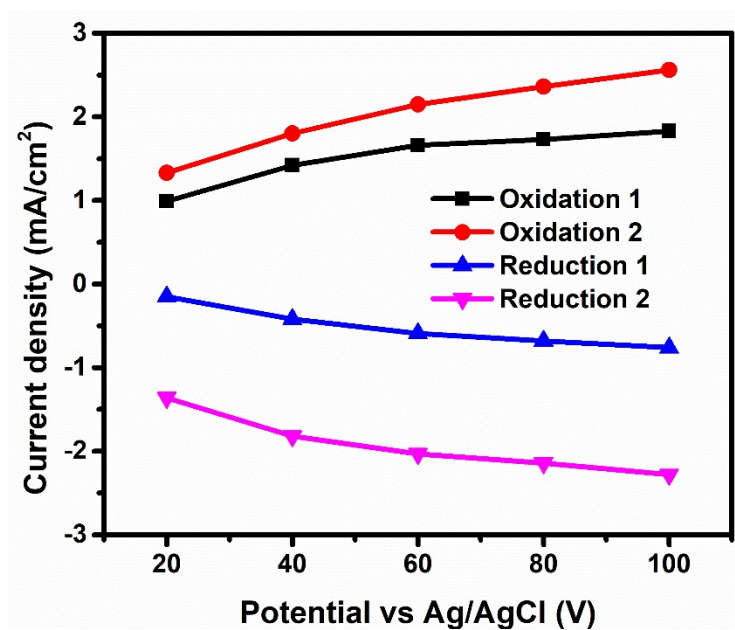

Fig. S5. Linear relationship of NFG-2 composite for current density shifts vs the scan rate.
